# Supplementary material for: In-depth Genetic Analysis of Sclerosing Epithelioid Fibrosarcoma Reveals Recurrent Genomic Alterations and Potential Treatment Targets
Source: Oxford University Press journal article supplement (doi:10.1158/1078-0432.ccr-17-1856), 2017-09-22
Supplement: 10780432ccr171856-sup-185601_2_supp_4255114_bvwkmb.docx [file 10780432ccr171856-sup-185601_2_supp_4255114_bvwkmb.docx]

| **Supplementary Table S2. Primers for RT-PCR detection of gene fusions.** | | | |
| --- | --- | --- | --- |
| **Primer** | **5' sequence** | **Accession number** | **Exon** |
| EWSR1-731F | cccactgagactagtcaacctca | NM_013986.3 | 7 |
| EWSR1-1059F | tggatcctacagccaagctc | NM_013986.3 | 8 |
| EWSR1 1363F | tcttgatctaggcccacctg | NM_013986.3 | 11 |
| EWSR1 1482F | tctttaagcagtgtggggttg | NM_013986.3 | 12 |
| EWSR1 1576F | cgatgccacagtgtcctatg | NM_013986.3 | 13 |
| FUS 1183F | tccggaaatcctatcaaggtc | NM_004960.3 | 11 |
| FUS 1224F | agactttaatcggggtggtg | NM_004960.3 | 11 |
| PAX5 579F | ttgctcatcaaggtgtcagg | NM_016734.2 | 2 |
| CREB3L1 1330R | ctttggtgagggggagtttt | NM_052854.3 | 6 |
| CREB3L1 1364R | ttcctccggactctcttcaa | NM_052854.3 | 6 |
| CREB3L1 1370R | tcttcttacgacggctctcc | NM_052854.3 | 7 |
| CREB3L2 1406R | taccttcttccgaagctcca | NM_194071.3 | 8 |
| CREB3L2 1370R | tttttctccaggctgtccat | NM_194071.3 | 7 |
| CREB3L2 1218R | cagggtcctcttctcctcct | NM_194071.3 | 6 |
| CREB3L2-1467R | tgaagcttctggagttgctg | NM_194071.3 | 9 |
| CREM 894R | tttgcgtgttgcttcttctg | NM_181571.2 | 7 |
| CREM 822R | ctgtggcaaagcagcagtag | NM_181571.2 | 7 |
